# Supplementary material
Source: ML conference proceedings conference paper supplement (https://openreview.net/forum?id=j9JL96S8Vl)
Supplement: supplementary_material [file attachment]

## Supplementary material

### A Closed-form updates of the assignment variables

In this section, we provide more details on the derivation of the closed-form update of variable  $\mathbf{U}$  at each iteration. Let  $F$  be defined as the cost function in (10) and let  $\partial F_{\mathbf{u}_n}(\mathbf{U}, \mathbf{W}, \mathbf{V})$  denote the Moreau subdifferential of  $F$  at  $(\mathbf{U}, \mathbf{W}, \mathbf{V})$  with respect to variable  $\mathbf{u}_n$ . We define  $\psi$  as

$$(\forall \mathbf{x} = (x_k)_{1 \leq k \leq K} \in \mathbb{R}^K) \quad \psi(\mathbf{x}) = \begin{cases} \sum_{k=1}^K x_k \ln(x_k) - \frac{x_k^2}{2} & \text{if } \mathbf{x} \in \Delta_K, \\ +\infty & \text{otherwise.} \end{cases} \quad (11)$$

It is well known that the proximity operator of  $\psi$  (see [34] Chap. 24 for a definition) is the softmax operator [44] Ex. 2.23].

At each step of the algorithm,  $\mathbf{u}_n$  is updated according to:

$$\begin{aligned} 0 &\in \partial F_{\mathbf{u}_n}(\mathbf{U}, \mathbf{W}, \mathbf{V}) \\ \iff 0 &\in \frac{1}{2} (\|\mathbf{w}_k - \mathbf{z}_n\|^2)_{1 \leq k \leq K} - \lambda[\mathbf{A}^* \mathbf{V}]_n + \mathbf{u}_n + \partial \psi(\mathbf{u}_n), \\ \iff -\frac{1}{2} (\|\mathbf{w}_k - \mathbf{z}_n\|^2)_{1 \leq k \leq K} &+ \lambda[\mathbf{A}^* \mathbf{V}]_n - \mathbf{u}_n \in \partial \psi(\mathbf{u}_n), \\ \iff \mathbf{u}_n &= \text{softmax} \left( -\frac{1}{2} (\|\mathbf{w}_k - \mathbf{z}_n\|^2)_{1 \leq k \leq K} + \lambda[\mathbf{A}^* \mathbf{V}]_n \right), \end{aligned} \quad (12)$$

where we used the definition of the proximity operator [34] Eq. 24.2] to obtain (12). We thus retrieve the update in Algorithm 1

### B Proof of Proposition 1

Our proof relies on the convergence result established in [45]. Given a convex set  $X$ , we denote  $\iota_X$  the indicator function of  $X$ , i.e.  $\iota_X(x) = 0$  if  $x \in X$ ,  $\iota_X(x) = +\infty$  otherwise. We rewrite problem 10 as the minimization of the following cost:

$$\begin{aligned} F(\mathbf{U}, \mathbf{W}, \mathbf{V}) &= \frac{1}{2} \sum_{k=1}^K \sum_{n=1}^N u_{n,k} \|\mathbf{w}_k - \mathbf{z}_n\|^2 + \lambda \sum_{k=1}^K e^{v_k - 1} - \lambda \langle \mathbf{V}, (\mathbf{A}\mathbf{U} + \epsilon \mathbf{1}_K) \rangle \\ &\quad + \sum_{n=1}^N \sum_{k=1}^K \varphi(u_{n,k}) + \iota_C(\mathbf{U}), \end{aligned} \quad (13)$$

where we have introduced an additional parameter  $\epsilon > 0$ , the role of which will become clearer in the rest of the proof. The optimum of the cost function  $F(\mathbf{U}, \mathbf{W}, \cdot)$  for given  $\mathbf{U} \in C$  and  $\mathbf{W} \in (\mathbb{R}^d)^K$  is reached when

$$\mathbf{V} = \mathbf{1}_K + \ln(\mathbf{A}\mathbf{U} + \epsilon \mathbf{1}_K) \in \mathbb{V}_\epsilon = [1 + \ln \epsilon, 1 + \ln(1 + \epsilon)]^K. \quad (14)$$

Thus, minimizing  $F$  is actually equivalent to minimizing

$$\begin{aligned} \tilde{F}(\mathbf{U}, \mathbf{W}, \mathbf{V}) &= \frac{1}{2} \sum_{k=1}^K \sum_{n=1}^N u_{n,k} \|\mathbf{w}_k - \mathbf{z}_n\|^2 + \lambda \sum_{k=1}^K e^{v_k - 1} - \lambda \langle \mathbf{V}, (\mathbf{A}\mathbf{U} + \epsilon \mathbf{1}_K) \rangle \\ &\quad + \sum_{n=1}^N \sum_{k=1}^K \varphi(u_{n,k}) + \iota_C(\mathbf{U}) + \iota_{\mathbb{V}_\epsilon}(\mathbf{V}). \end{aligned} \quad (15)$$

The following algorithm for minimizing  $\tilde{F}$  turns out to be a simple modified version of PADDLE (see Algorithm 1):

---

**Algorithm 2:** Alternating algorithm for minimizing  $\tilde{F}$ 


---

Initialize  $\mathbf{W}^{(0)}$  as the prototypes computed on the support, and  $\mathbf{V}^{(0)} = \mathbf{0}$ .

for  $\ell = 1, 2, \dots$ , do

$$\left\{ \begin{array}{l} \mathbf{U}^{(\ell)} = \operatorname{softmax} \left( -\frac{1}{2} \left( \|\mathbf{w}_k - \mathbf{z}_n\|^2 \right)_{\substack{1 \leq n \leq N \\ 1 \leq k \leq K}} + \lambda \mathbf{A}^* \mathbf{V}^{(\ell-1)} \right), \\ v_k^{(\ell)} = 1 + \ln((\mathbf{A}\mathbf{U}^{(\ell)})_k + \epsilon), \quad \forall k \in \{1, \dots, K\}, \\ \mathbf{w}_k^{(\ell)} = \sum_{n=1}^N \mathbf{u}_{n,k}^{(\ell-1)} \mathbf{z}_n / \sum_{n=1}^N \mathbf{u}_{n,k}^{(\ell-1)}, \quad \forall k \in \{1, \dots, K\}. \end{array} \right.$$


---

According to [45] Thm 4.1], if the following assumptions are satisfied:

1. The set  $\{(U, \mathbf{W}, \mathbf{V}) : \tilde{F}(U, \mathbf{W}, \mathbf{V}) \leq \tilde{F}(U^{(0)}, \mathbf{W}^{(0)}, \mathbf{V}^{(0)})\}$  is compact;
2.  $\tilde{F}$  is continuous on  $C \times (\mathbb{R}^d)^K \times \mathbb{V}_\epsilon$ ;
3. At each iteration  $\ell$ , the partial functions  $\tilde{F}(\cdot, \mathbf{W}^{(\ell)}, \mathbf{V}^{(\ell)})$ ,  $\tilde{F}(U^{(\ell+1)}, \cdot, \mathbf{V}^{(\ell)})$  and  $\tilde{F}(U^{(\ell+1)}, \mathbf{W}^{(\ell+1)}, \cdot)$  admit a unique minimizer,

then the sequence generated by the algorithm is bounded and every of its cluster points is a coordinatewise minimizer of  $\tilde{F}$ . We now show that the above assumptions hold.

1. Let us show that  $\tilde{F}$  is coercive. We derive a lower bound on  $\tilde{F}$  using the Cauchy-Schwarz inequality:

$$\begin{aligned} \tilde{F}(U, \mathbf{W}, \mathbf{V}) &\geq \frac{1}{2} \sum_{k=1}^K \sum_{n=|\mathbb{Q}|+1}^N y_{n,k} \|\mathbf{w}_k - \mathbf{z}_n\|^2 + \lambda \sum_{k=1}^K e^{v_k-1} - \lambda \|\mathbf{V}\| \|\mathbf{A}\mathbf{U}\| \\ &\quad - \epsilon \langle \mathbf{V}, \mathbf{1}_K \rangle + \sum_{n=1}^N \sum_{k=1}^K \varphi(u_{n,k}) + \iota_C(\mathbf{U}) + \iota_{\mathbb{V}_\epsilon}(\mathbf{V}). \end{aligned} \quad (16)$$

Since the functions  $U \mapsto \|\mathbf{A}\mathbf{U}\|$  and  $U \mapsto \sum_{n=1}^N \sum_{k=1}^K \varphi(u_{n,k})$  are continuous on the compact set  $C$ , there exist constants  $\mu$  and  $\theta$  such that

$$\begin{aligned} \tilde{F}(U, \mathbf{W}, \mathbf{V}) &\geq \frac{1}{2} \sum_{k=1}^K \sum_{n=|\mathbb{Q}|+1}^N y_{n,k} \|\mathbf{w}_k - \mathbf{z}_n\|^2 + \lambda \sum_{k=1}^K e^{v_k-1} - \theta \|\mathbf{V}\| \\ &\quad - \epsilon \langle \mathbf{V}, \mathbf{1}_K \rangle + \mu + \iota_C(\mathbf{U}) + \iota_{\mathbb{V}_\epsilon}(\mathbf{V}). \end{aligned} \quad (17)$$

The lower bound obtained in (17) is separable in  $(U, \mathbf{W}, \mathbf{V})$ . The term with respect to variable  $\mathbf{W}$  is coercive when, for every  $k \in \{1, \dots, K\}$ , there exists  $n \in \{|\mathbb{Q}| + 1, \dots, N\}$  such that  $y_{n,k} > 0$ . In other words, it is coercive if the support set includes at least one example of each class, which is a reasonable assumption. The terms with respect to variables  $U$  and  $\mathbf{V}$  are clearly coercive too. Hence, the cost function  $\tilde{F}$  is coercive. Finally, since  $\tilde{F}$  is lower semi-continuous, condition 1. is satisfied.

2. The continuity of  $\tilde{F}$  on  $C \times \mathbb{R}^{k \times d} \times \mathbb{V}_\epsilon$  is clear.
3. Let  $\ell \in N^*$ . We already proved in Appendix A that the partial function with respect to variable  $U$  has a unique minimizer. It follows from the same arguments as above that the partial function with respect to  $\mathbf{W}$  is strictly convex, continuous, and coercive as soon as the support set contains at least one example of each class. Hence, it admits a unique minimizer. Regarding the partial function with respect to variable  $\mathbf{V}$ , we first remark that given the definition of the softmax operator,  $\mathbf{A}\mathbf{U}^{(\ell+1)}$  is necessarily strictly positive component-wise. Up to some additive term independent of  $\mathbf{V}$ , the partial function reads

$$\mathbf{V} \mapsto \lambda \sum_{k=1}^K \left( e^{v_k-1} - v_k([\mathbf{A}\mathbf{U}^{(\ell+1)})_k + \epsilon) + \iota_{[\ln \epsilon, \ln(1+\epsilon)]}(v_k - 1) \right). \quad (18)$$

The latter function is strictly convex, lower-semicontinuous, and coercive, which concludes the proof.

Note that, since

$$v_k \mapsto \lambda \left( e^{v_k-1} - v_k([\mathbf{A}\mathbf{U}^{(\ell+1)}]_k + \epsilon) \right) \quad (19)$$

is decreasing on  $] -\infty, 1 + \ln([\mathbf{A}\mathbf{U}^{(\ell+1)}]_k + \epsilon)$  and increasing on  $[1 + \ln([\mathbf{A}\mathbf{U}^{(\ell+1)}]_k + \epsilon), +\infty[$ , the resulting cluster points are also coordinatewise minimizers of  $F$ .

In summary, PADDLE can be understood as the limit case of Algorithm 2 when  $\epsilon$  goes to zero. This simplification is justified by the fact that  $\epsilon$  can be chosen arbitrarily small and that we did not observe any change in practical behaviour of the proposed algorithm by setting  $\epsilon = 0$ .

### C Label cost relaxation

The plot in Figure 5 illustrates in the case  $K = 2$  how our model-complexity term in (2) could be viewed as a continuous relaxation of the discrete label cost function defined in (3).

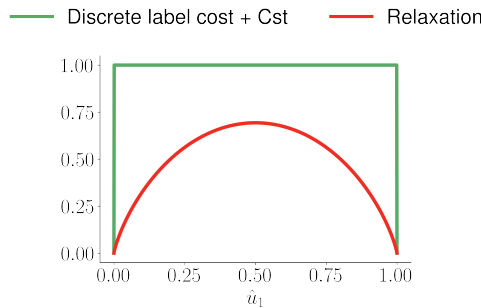

Figure 5: Label cost as a function of  $\hat{u}_1$  and our proposed relaxation  $\hat{u}_1 \mapsto -\hat{u}_1 \ln(\hat{u}_1) - (1 - \hat{u}_1) \ln(1 - \hat{u}_1)$ .

### D Plots obtained using WRN backbone

In Figure 6 we provide additional comparisons of PADDLE with state-of-the-art methods using a WRN28-10 network. We report the accuracy obtained for each method as a function of  $K_{\text{eff}}$ . These plots point to the same conclusions drawn in Section 5

### E About the hyper-parameter in our method

As discussed in Section 3 PADDLE does not require parameter tuning. In Figure 7 we investigate the optimal value of parameter  $\lambda$  in (10) as a function of the size of the query set, for 3 different values of  $K_{\text{eff}}$ . We observe that the optimal value of  $\lambda$  increases linearly with  $|\mathcal{Q}|$ . As it could be expected, the higher the level of class imbalance ( $K_{\text{eff}} = 2$ ), the higher the optimal value of  $\lambda$  (w.r.t. its theoretical value). On the contrary, when the query is better balanced ( $K_{\text{eff}} = 10$ ), the optimal value of  $\lambda$  is slightly under its theoretical value. However, Figure 8 shows that the gap of performance when using the theoretical value of  $\lambda$  instead of the optimal one, is only of the order of a few percents.

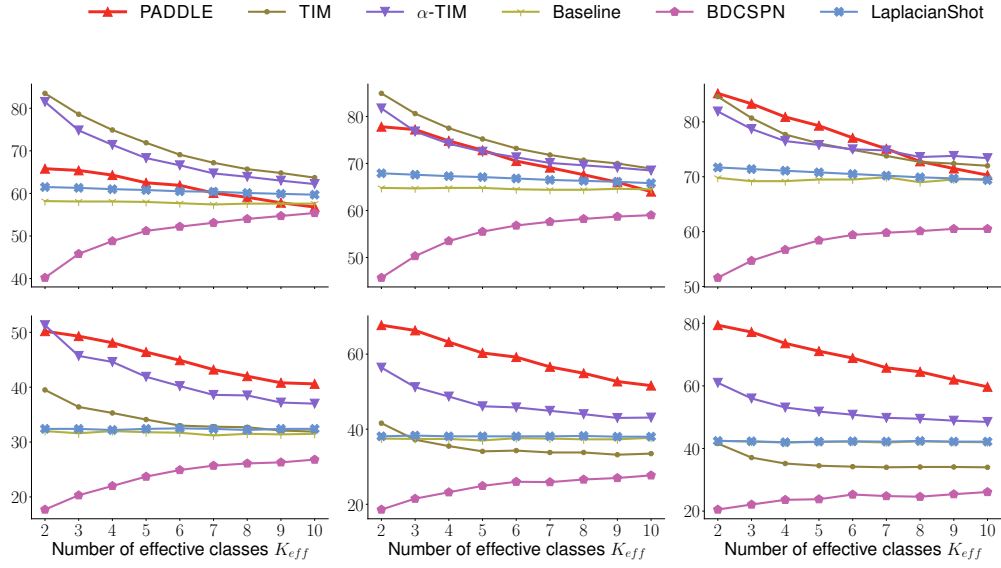

Figure 6: Evolution of the accuracy as a function of  $K_{eff}$ . Each row represents a dataset, and each column a fixed number of shots. All methods use the same WRN28-10 network. Results are averaged across 10,000 tasks.

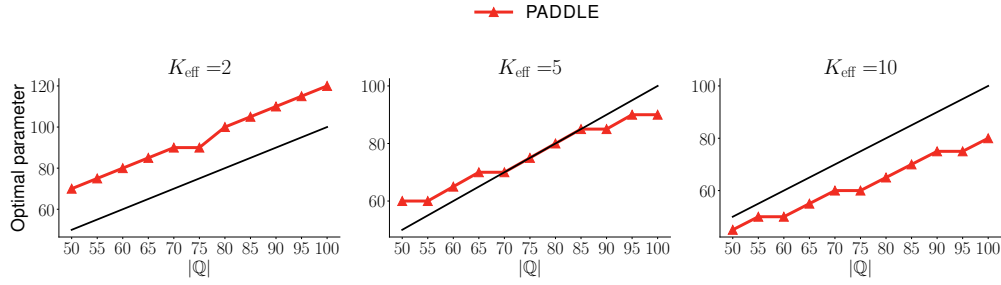

Figure 7: Evolution of the optimal parameter  $\lambda$  (i.e. the one with which the best accuracy is reached) as a function of  $|Q|$ . Each column represents a fixed number of effective classes. The black line represents the identity function. The results were computed on the *tiered* dataset with a Resnet18 as a backbone.

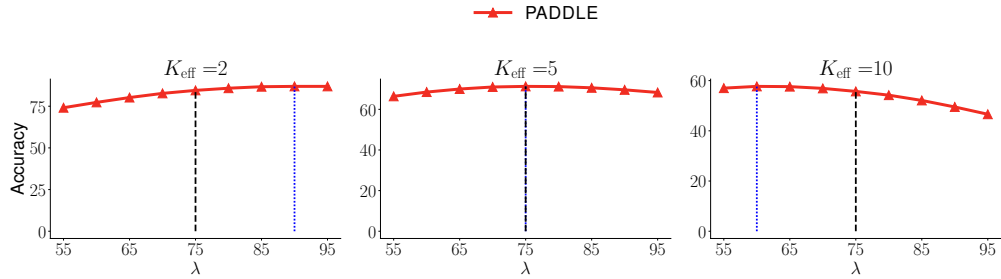

Figure 8: Evolution of the accuracy as a function of  $\lambda$ . Each column represents a fixed number of effective classes. The results were computed on the *tiered* dataset with a Resnet18 as a backbone, and the size query set was fixed to  $|Q| = 75$ . The blue dotted line represents the optimal value of  $\lambda$  while the black dashed line represents the theoretical value of  $\lambda$ , i.e.  $\lambda = |Q|$ .
